# Supplementary material for: Autism screening at 18 months of age: a comparison of the Q-CHAT-10 and M-CHAT screeners
Source: PubMed Central journal article supplement (PMC8722322; doi:10.1186/s13229-021-00480-4), 2022-01-03
Supplement: 13229_2021_480_MOESM1_ESM.pdf [file 13229_2021_480_MOESM1_ESM.pdf]

**Table 1 - Developmental Diagnostic Outcomes by Autism Diagnosis**

|                             | Autism<br>Negative | Autism<br>Positive | Difference | <i>t</i> | df  | <i>p</i> |
|-----------------------------|--------------------|--------------------|------------|----------|-----|----------|
| Gross Motor T-Score         | 51.65              | 46.02              | -5.63      | 4.330    | 403 | < .001   |
| Fine Motor T-Score          | 51.76              | 44.13              | -7.62      | 6.231    | 403 | < .001   |
| Visual Reception T-Score    | 56.29              | 44.33              | -11.97     | 7.680    | 402 | < .001   |
| Receptive Language T-Score  | 53.62              | 31.82              | -21.80     | 11.142   | 402 | < .001   |
| Expressive Language T-Score | 48.22              | 33.05              | -15.17     | 8.710    | 403 | < .001   |

**Table 2 - Developmental Diagnostic Outcomes by M-CHAT-R Result**

|                             | M-CHAT-R<br>Negative | M-CHAT-R<br>Positive | Difference | <i>t</i> | df  | <i>p</i> |
|-----------------------------|----------------------|----------------------|------------|----------|-----|----------|
| Gross Motor T-Score         | 52.33                | 48.52                | -3.82      | 4.016    | 403 | < .001   |
| Fine Motor T-Score          | 52.08                | 48.42                | -3.67      | 4.000    | 403 | < .001   |
| Visual Reception T-Score    | 57.13                | 50.58                | -6.56      | 5.589    | 402 | < .001   |
| Receptive Language T-Score  | 55.32                | 42.95                | -12.37     | 8.176    | 402 | < .001   |
| Expressive Language T-Score | 49.93                | 40.00                | -9.93      | 7.680    | 403 | < .001   |

**Table 3 - Developmental Diagnostic Outcomes by M-CHAT-R/F Result**

|                             | M-CHAT-R/F<br>Negative | M-CHAT-R/F<br>Positive | Difference | <i>t</i> | df  | <i>p</i> |
|-----------------------------|------------------------|------------------------|------------|----------|-----|----------|
| Gross Motor T-Score         | 51.78                  | 46.34                  | -5.44      | 3.984    | 363 | < .001   |
| Fine Motor T-Score          | 52.02                  | 44.70                  | -7.32      | 5.659    | 363 | < .001   |
| Visual Reception T-Score    | 56.40                  | 47.47                  | -8.93      | 5.248    | 362 | < .001   |
| Receptive Language T-Score  | 53.67                  | 39.28                  | -14.39     | 6.546    | 362 | < .001   |
| Expressive Language T-Score | 48.37                  | 37.66                  | -10.71     | 5.497    | 363 | < .001   |

**Table 4 - Developmental Diagnostic Outcomes by Q-CHAT-10 Result**

|                             | Q-CHAT-10<br>Negative | Q-CHAT-10<br>Positive | Difference | <i>t</i> | df  | <i>p</i> |
|-----------------------------|-----------------------|-----------------------|------------|----------|-----|----------|
| Gross Motor T-Score         | 51.48                 | 44.47                 | -7.01      | 4.387    | 401 | < .001   |
| Fine Motor T-Score          | 51.39                 | 43.11                 | -8.28      | 5.446    | 401 | < .001   |
| Visual Reception T-Score    | 55.60                 | 44.05                 | -11.54     | 5.870    | 400 | < .001   |
| Receptive Language T-Score  | 52.12                 | 34.42                 | -17.70     | 6.831    | 400 | < .001   |
| Expressive Language T-Score | 47.31                 | 33.29                 | -14.02     | 6.311    | 401 | < .001   |

**Table 5 - Developmental Diagnostic Outcomes by Positive on M-CHAT-R OR Q-CHAT-10**

|                             | No    | Yes   | Difference | <i>t</i> | df  | <i>p</i> |
|-----------------------------|-------|-------|------------|----------|-----|----------|
| Gross Motor T-Score         | 52.32 | 48.63 | -3.69      | 3.869    | 401 | < .001   |
| Fine Motor T-Score          | 52.13 | 48.38 | -3.75      | 4.078    | 401 | < .001   |
| Visual Reception T-Score    | 57.18 | 50.62 | -6.56      | 5.581    | 400 | < .001   |
| Receptive Language T-Score  | 55.47 | 43.16 | -12.30     | 8.150    | 400 | < .001   |
| Expressive Language T-Score | 50.15 | 39.93 | -10.22     | 7.935    | 401 | < .001   |

**Table 6 - Autism Diagnosis by Screening Result**

|                                                  | Screen Negative | Screen Positive | Difference | N   | <i>z</i> | <i>p</i> |
|--------------------------------------------------|-----------------|-----------------|------------|-----|----------|----------|
| Autism Positive   M-CHAT-R Result                | 6.97%           | 28.05%          | -21.08%    | 408 | -5.78    | < .001   |
| Autism Positive   M-CHAT-R/F Result              | 10.79%          | 35.85%          | -25.06%    | 368 | -4.81    | < .001   |
| Autism Positive   Q-CHAT-10 Result               | 11.17%          | 53.85%          | -42.67%    | 406 | -7.04    | < .001   |
| Autism Positive   (M-CHAT-R or Q-CHAT-10) Result | 6.64%           | 27.88%          | -21.24%    | 406 | -5.84    | < .001   |
