# Supplementary material for: Autism screening at 18 months of age: a comparison of the Q-CHAT-10 and M-CHAT screeners
Source: PubMed Central journal article supplement (PMC8722322; doi:10.1186/s13229-021-00480-4), 2022-01-03
Supplement: 13229_2021_480_MOESM3_ESM.pdf [file 13229_2021_480_MOESM3_ESM.pdf]

**Table 4a - ASD Screening Performance Comparisons - Comparand: M-CHAT-R**

| Screen                   | Sensitivity                     | Specificity                     | PPV                             | NPV                                |
|--------------------------|---------------------------------|---------------------------------|---------------------------------|------------------------------------|
| <b>M-CHAT-R</b><br>n=408 | <b>0.73 [0.61, 0.82]</b>        | <b>0.66 [0.61, 0.71]</b>        | <b>0.28 [0.22, 0.35]</b>        | <b>0.93 [0.89, 0.96]</b>           |
| M-CHAT-R/F<br>n=368      | 0.36 [0.24, 0.49]<br>Difference | 0.89 [0.85, 0.92]<br>Difference | 0.36 [0.24, 0.49]<br>Difference | 0.89 [0.85, 0.92]<br>Indeterminate |
| Q-CHAT-10<br>n=406       | 0.34 [0.23, 0.46]<br>Difference | 0.95 [0.92, 0.97]<br>Difference | 0.54 [0.39, 0.68]<br>Difference | 0.89 [0.85, 0.92]<br>Difference    |
| Q-CHAT-10-O<br>n=406     | 0.63 [0.50, 0.74]<br>Difference | 0.79 [0.74, 0.83]<br>Difference | 0.35 [0.27, 0.44]<br>Difference | 0.92 [0.89, 0.95]<br>Equivalence   |

**Table 4b - ASD Screening Performance Comparisons - Comparand: M-CHAT-R/F**

| Screen                     | Sensitivity                        | Specificity                     | PPV                                | NPV                                |
|----------------------------|------------------------------------|---------------------------------|------------------------------------|------------------------------------|
| M-CHAT-R<br>n=408          | 0.73 [0.61, 0.82]<br>Difference    | 0.66 [0.61, 0.71]<br>Difference | 0.28 [0.22, 0.35]<br>Difference    | 0.93 [0.89, 0.96]<br>Indeterminate |
| <b>M-CHAT-R/F</b><br>n=368 | <b>0.36 [0.24, 0.49]</b>           | <b>0.89 [0.85, 0.92]</b>        | <b>0.36 [0.24, 0.49]</b>           | <b>0.89 [0.85, 0.92]</b>           |
| Q-CHAT-10<br>n=406         | 0.34 [0.23, 0.46]<br>Indeterminate | 0.95 [0.92, 0.97]<br>Difference | 0.54 [0.39, 0.68]<br>Difference    | 0.89 [0.85, 0.92]<br>Equivalence   |
| Q-CHAT-10-O<br>n=406       | 0.63 [0.50, 0.74]<br>Difference    | 0.79 [0.74, 0.83]<br>Difference | 0.35 [0.27, 0.44]<br>Indeterminate | 0.92 [0.89, 0.95]<br>Indeterminate |

**Table 4c - ASD Screening Performance Comparisons - Comparand: Q-CHAT-10**

| Screen                    | Sensitivity                        | Specificity                     | PPV                             | NPV                                |
|---------------------------|------------------------------------|---------------------------------|---------------------------------|------------------------------------|
| M-CHAT-R<br>n=408         | 0.73 [0.61, 0.82]<br>Difference    | 0.66 [0.61, 0.71]<br>Difference | 0.28 [0.22, 0.35]<br>Difference | 0.93 [0.89, 0.96]<br>Difference    |
| M-CHAT-R/F<br>n=368       | 0.36 [0.24, 0.49]<br>Indeterminate | 0.89 [0.85, 0.92]<br>Difference | 0.36 [0.24, 0.49]<br>Difference | 0.89 [0.85, 0.92]<br>Equivalence   |
| <b>Q-CHAT-10</b><br>n=406 | <b>0.34 [0.23, 0.46]</b>           | <b>0.95 [0.92, 0.97]</b>        | <b>0.54 [0.39, 0.68]</b>        | <b>0.89 [0.85, 0.92]</b>           |
| Q-CHAT-10-O<br>n=406      | 0.63 [0.50, 0.74]<br>Difference    | 0.79 [0.74, 0.83]<br>Difference | 0.35 [0.27, 0.44]<br>Difference | 0.92 [0.89, 0.95]<br>Indeterminate |

**Table 4d - ASD Screening Performance Comparisons - Comparand: Q-CHAT-10-O**

| Screen                      | Sensitivity                     | Specificity                     | PPV                                | NPV                                |
|-----------------------------|---------------------------------|---------------------------------|------------------------------------|------------------------------------|
| M-CHAT-R<br>n=408           | 0.73 [0.61, 0.82]<br>Difference | 0.66 [0.61, 0.71]<br>Difference | 0.28 [0.22, 0.35]<br>Difference    | 0.93 [0.89, 0.96]<br>Equivalence   |
| M-CHAT-R/F<br>n=368         | 0.36 [0.24, 0.49]<br>Difference | 0.89 [0.85, 0.92]<br>Difference | 0.36 [0.24, 0.49]<br>Indeterminate | 0.89 [0.85, 0.92]<br>Indeterminate |
| Q-CHAT-10<br>n=406          | 0.34 [0.23, 0.46]<br>Difference | 0.95 [0.92, 0.97]<br>Difference | 0.54 [0.39, 0.68]<br>Difference    | 0.89 [0.85, 0.92]<br>Indeterminate |
| <b>Q-CHAT-10-O</b><br>n=406 | <b>0.63 [0.50, 0.74]</b>        | <b>0.79 [0.74, 0.83]</b>        | <b>0.35 [0.27, 0.44]</b>           | <b>0.92 [0.89, 0.95]</b>           |
