# Supplementary material for: Autism screening at 18 months of age: a comparison of the Q-CHAT-10 and M-CHAT screeners
Source: Springer Nature journal article supplement (doi:10.1186/s13229-021-00480-4), 2022-01-03
Supplement: MOESM2 [file 19991860]

**Table 1 - Patient Demographics by Autism Diagnosis**

|                                      | Autism Diagnosis |        |          |        | $\chi$          | <i>p</i> |
|--------------------------------------|------------------|--------|----------|--------|-----------------|----------|
|                                      | Negative         |        | Positive |        |                 |          |
|                                      | n                | %      | n        | %      |                 |          |
| Diagnosis Age (Months) - [Mean (SD)] | 20.52            | (1.87) | 20.29    | (1.80) | <i>t</i> = 0.86 | .389     |
| Diagnosis Age (Months) - [Min Max]   | 16.76            | 31.54  | 16.99    | 26.71  |                 |          |
| Sex                                  |                  |        |          |        | 1.21            | .271     |
| Female                               | 100              | 28.99% | 14       | 22.22% |                 |          |
| Male                                 | 245              | 71.01% | 49       | 77.78% |                 |          |
| Race                                 |                  |        |          |        | 8.16            | .086     |
| Asian                                | 15               | 4.39%  | 4        | 6.56%  |                 |          |
| Black                                | 28               | 8.19%  | 11       | 18.03% |                 |          |
| White                                | 245              | 71.64% | 36       | 59.02% |                 |          |
| Multiple                             | 48               | 14.04% | 10       | 16.39% |                 |          |
| Unknown                              | 6                | 1.75%  | 0        | 0.00%  |                 |          |
| Hispanic or Latino                   |                  |        |          |        | 0.43            | .806     |
| No                                   | 319              | 93.27% | 56       | 91.80% |                 |          |
| Yes                                  | 22               | 6.43%  | 5        | 8.20%  |                 |          |
| Private Payer                        |                  |        |          |        | 6.46            | .011     |
| Yes                                  | 300              | 87.72% | 46       | 75.41% |                 |          |
| Public Payer                         |                  |        |          |        | 3.81            | .051     |
| Yes                                  | 36               | 10.43% | 12       | 19.05% |                 |          |
| Other Payer                          |                  |        |          |        | 0.29            | .593     |
| Yes                                  | 41               | 11.88% | 9        | 14.29% |                 |          |
| Household Income                     |                  |        |          |        | 19.88           | < .001   |
| < \$50,000                           | 9                | 3.85%  | 9        | 22.50% |                 |          |
| \$50,000 - \$150,000                 | 114              | 48.72% | 18       | 45.00% |                 |          |
| >= \$150,000                         | 111              | 47.44% | 13       | 32.50% |                 |          |

**Table 2 - Patient Demographics by MCHAT-R Result**

|                                      | MCHAT-R Result |        |          |        | $\chi$          | <i>p</i> |
|--------------------------------------|----------------|--------|----------|--------|-----------------|----------|
|                                      | Negative       |        | Positive |        |                 |          |
|                                      | n              | %      | n        | %      |                 |          |
| Diagnosis Age (Months) - [Mean (SD)] | 18.02          | (0.45) | 18.01    | (0.64) | <i>t</i> = 0.22 | .822     |
| Diagnosis Age (Months) - [Min Max]   | 16.13          | 19.32  | 16.03    | 19.91  |                 |          |
| Sex                                  |                |        |          |        | 1.93            | .165     |
| Female                               | 62             | 25.41% | 52       | 31.71% |                 |          |
| Male                                 | 182            | 74.59% | 112      | 68.29% |                 |          |
| Race                                 |                |        |          |        | 16.21           | .003     |
| Asian                                | 11             | 4.55%  | 8        | 4.97%  |                 |          |
| Black                                | 14             | 5.79%  | 25       | 15.53% |                 |          |
| White                                | 180            | 74.38% | 101      | 62.73% |                 |          |
| Multiple                             | 36             | 14.88% | 22       | 13.66% |                 |          |
| Unknown                              | 1              | 0.41%  | 5        | 3.11%  |                 |          |
| Hispanic or Latino                   |                |        |          |        | 1.52            | .468     |
| No                                   | 226            | 93.39% | 149      | 92.55% |                 |          |
| Yes                                  | 16             | 6.61%  | 11       | 6.83%  |                 |          |
| Private Payer                        |                |        |          |        | 4.45            | .035     |
| Yes                                  | 215            | 88.84% | 131      | 81.37% |                 |          |
| Public Payer                         |                |        |          |        | 5.83            | .016     |
| Yes                                  | 21             | 8.61%  | 27       | 16.46% |                 |          |
| Other Payer                          |                |        |          |        | 0.08            | .781     |
| Yes                                  | 29             | 11.89% | 21       | 12.80% |                 |          |
| Household Income                     |                |        |          |        | 13.48           | .001     |
| < \$50,000                           | 5              | 2.91%  | 13       | 12.75% |                 |          |
| \$50,000 - \$150,000                 | 79             | 45.93% | 53       | 51.96% |                 |          |
| >= \$150,000                         | 88             | 51.16% | 36       | 35.29% |                 |          |

**Table 3 - Patient Demographics by MCHAT-R/F Result**

|                                      | MCHAT-R/F Result |        |          |        | $\chi$          | <i>p</i> |
|--------------------------------------|------------------|--------|----------|--------|-----------------|----------|
|                                      | Negative         |        | Positive |        |                 |          |
|                                      | n                | %      | n        | %      |                 |          |
| Diagnosis Age (Months) - [Mean (SD)] | 18.02            | (0.47) | 17.98    | (0.74) | <i>t</i> = 0.53 | .594     |
| Diagnosis Age (Months) - [Min Max]   | 16.10            | 19.48  | 16.03    | 19.91  |                 |          |
| Sex                                  |                  |        |          |        | 0.37            | .544     |
| Female                               | 90               | 28.57% | 13       | 24.53% |                 |          |
| Male                                 | 225              | 71.43% | 40       | 75.47% |                 |          |
| Race                                 |                  |        |          |        | 31.39           | < .001   |
| Asian                                | 16               | 5.11%  | 2        | 3.85%  |                 |          |
| Black                                | 23               | 7.35%  | 10       | 19.23% |                 |          |
| White                                | 226              | 72.20% | 33       | 63.46% |                 |          |
| Multiple                             | 47               | 15.02% | 4        | 7.69%  |                 |          |
| Unknown                              | 1                | 0.32%  | 3        | 5.77%  |                 |          |
| Hispanic or Latino                   |                  |        |          |        | 1.28            | .527     |
| No                                   | 294              | 93.93% | 47       | 90.38% |                 |          |
| Yes                                  | 18               | 5.75%  | 5        | 9.62%  |                 |          |
| Private Payer                        |                  |        |          |        | 2.60            | .107     |
| Yes                                  | 273              | 87.22% | 41       | 78.85% |                 |          |
| Public Payer                         |                  |        |          |        | 7.20            | .007     |
| Yes                                  | 31               | 9.84%  | 12       | 22.64% |                 |          |
| Other Payer                          |                  |        |          |        | 0.03            | .866     |
| Yes                                  | 39               | 12.38% | 7        | 13.21% |                 |          |
| Household Income                     |                  |        |          |        | 16.76           | < .00    |
| < \$50,000                           | 9                | 4.05%  | 7        | 23.33% |                 |          |
| \$50,000 - \$150,000                 | 108              | 48.65% | 13       | 43.33% |                 |          |
| >= \$150,000                         | 105              | 47.30% | 10       | 33.33% |                 |          |

**Table 4 - Patient Demographics by QCHAT-10 Result**

|                                      | QCHAT-10 Result |        |          |        | $\chi$      | <i>p</i> |
|--------------------------------------|-----------------|--------|----------|--------|-------------|----------|
|                                      | Negative        |        | Positive |        |             |          |
|                                      | n               | %      | n        | %      |             |          |
| Diagnosis Age (Months) - [Mean (SD)] | 18.01           | (0.53) | 18.08    | (0.60) | $t = -0.83$ | .406     |
| Diagnosis Age (Months) - [Min Max]   | 16.03           | 19.91  | 16.23    | 19.32  |             |          |
| Sex                                  |                 |        |          |        | 6.64        | .010     |
| Female                               | 109             | 29.70% | 4        | 10.26% |             |          |
| Male                                 | 258             | 70.30% | 35       | 89.74% |             |          |
| Race                                 |                 |        |          |        | 7.88        | .096     |
| Asian                                | 19              | 5.23%  | 0        | 0.00%  |             |          |
| Black                                | 32              | 8.82%  | 6        | 15.79% |             |          |
| White                                | 255             | 70.25% | 25       | 65.79% |             |          |
| Multiple                             | 53              | 14.60% | 5        | 13.16% |             |          |
| Unknown                              | 4               | 1.10%  | 2        | 5.26%  |             |          |
| Hispanic or Latino                   |                 |        |          |        | 1.14        | .565     |
| No                                   | 337             | 92.84% | 37       | 97.37% |             |          |
| Yes                                  | 25              | 6.89%  | 1        | 2.63%  |             |          |
| Private Payer                        |                 |        |          |        | 7.84        | .005     |
| Yes                                  | 318             | 87.60% | 27       | 71.05% |             |          |
| Public Payer                         |                 |        |          |        | 3.62        | .057     |
| Yes                                  | 38              | 10.35% | 8        | 20.51% |             |          |
| Other Payer                          |                 |        |          |        | 0.38        | .540     |
| Yes                                  | 44              | 11.99% | 6        | 15.38% |             |          |
| Household Income                     |                 |        |          |        | 7.42        | .025     |
| < \$50,000                           | 13              | 5.18%  | 4        | 18.18% |             |          |
| \$50,000 - \$150,000                 | 120             | 47.81% | 12       | 54.55% |             |          |
| >= \$150,000                         | 118             | 47.01% | 6        | 27.27% |             |          |

**Table 5 - Patient Demographics by QCHAT-10-O Result**

|                                      | QCHAT-10-O Result |        |          |        | $\chi$           | <i>p</i> |
|--------------------------------------|-------------------|--------|----------|--------|------------------|----------|
|                                      | Negative          |        | Positive |        |                  |          |
|                                      | n                 | %      | n        | %      |                  |          |
| Diagnosis Age (Months) - [Mean (SD)] | 18.00             | (0.52) | 18.06    | (0.57) | <i>t</i> = -0.96 | .340     |
| Diagnosis Age (Months) - [Min Max]   | 16.03             | 19.91  | 16.07    | 19.32  |                  |          |
| Sex                                  |                   |        |          |        | 2.93             | .087     |
| Female                               | 89                | 30.17% | 24       | 21.62% |                  |          |
| Male                                 | 206               | 69.83% | 87       | 78.38% |                  |          |
| Race                                 |                   |        |          |        | 2.13             | .712     |
| Asian                                | 13                | 4.47%  | 6        | 5.45%  |                  |          |
| Black                                | 25                | 8.59%  | 13       | 11.82% |                  |          |
| White                                | 209               | 71.82% | 71       | 64.55% |                  |          |
| Multiple                             | 40                | 13.75% | 18       | 16.36% |                  |          |
| Unknown                              | 4                 | 1.37%  | 2        | 1.82%  |                  |          |
| Hispanic or Latino                   |                   |        |          |        | 2.65             | .265     |
| No                                   | 272               | 93.47% | 102      | 92.73% |                  |          |
| Yes                                  | 19                | 6.53%  | 7        | 6.36%  |                  |          |
| Private Payer                        |                   |        |          |        | 3.31             | .069     |
| Yes                                  | 256               | 87.97% | 89       | 80.91% |                  |          |
| Public Payer                         |                   |        |          |        | 0.72             | .395     |
| Yes                                  | 31                | 10.51% | 15       | 13.51% |                  |          |
| Other Payer                          |                   |        |          |        | 0.01             | .911     |
| Yes                                  | 36                | 12.20% | 14       | 12.61% |                  |          |
| Household Income                     |                   |        |          |        | 4.70             | .095     |
| < \$50,000                           | 9                 | 4.43%  | 8        | 11.43% |                  |          |
| \$50,000 - \$150,000                 | 98                | 48.28% | 34       | 48.57% |                  |          |
| >= \$150,000                         | 96                | 47.29% | 28       | 40.00% |                  |          |

**Table 6 - Patient Demographics by Positive on M-CHAT-R OR Q-CHAT-10**

|                                      | M-CHAT-R OR Q-CHAT-10 |        |          |        | $\chi$          | <i>p</i> |
|--------------------------------------|-----------------------|--------|----------|--------|-----------------|----------|
|                                      | Negative              |        | Positive |        |                 |          |
|                                      | n                     | %      | n        | %      |                 |          |
| Diagnosis Age (Months) - [Mean (SD)] | 18.03                 | (0.44) | 18.00    | (0.65) | <i>t</i> = 0.52 | .606     |
| Diagnosis Age (Months) - [Min Max]   | 16.13                 | 19.32  | 16.03    | 19.91  |                 |          |
| Sex                                  |                       |        |          |        | 1.31            | .252     |
| Female                               | 62                    | 25.73% | 51       | 30.91% |                 |          |
| Male                                 | 179                   | 74.27% | 114      | 69.09% |                 |          |
| Race                                 |                       |        |          |        | 14.64           | .006     |
| Asian                                | 11                    | 4.60%  | 8        | 4.94%  |                 |          |
| Black                                | 14                    | 5.86%  | 24       | 14.81% |                 |          |
| White                                | 178                   | 74.48% | 102      | 62.96% |                 |          |
| Multiple                             | 35                    | 14.64% | 23       | 14.20% |                 |          |
| Unknown                              | 1                     | 0.42%  | 5        | 3.09%  |                 |          |
| Hispanic or Latino                   |                       |        |          |        | 1.52            | .469     |
| No                                   | 223                   | 93.31% | 151      | 93.21% |                 |          |
| Yes                                  | 16                    | 6.69%  | 10       | 6.17%  |                 |          |
| Private Payer                        |                       |        |          |        | 4.69            | .030     |
| Yes                                  | 213                   | 89.12% | 132      | 81.48% |                 |          |
| Public Payer                         |                       |        |          |        | 4.04            | .044     |
| Yes                                  | 21                    | 8.71%  | 25       | 15.15% |                 |          |
| Other Payer                          |                       |        |          |        | 0.27            | .605     |
| Yes                                  | 28                    | 11.62% | 22       | 13.33% |                 |          |
| Household Income                     |                       |        |          |        | 12.41           | .002     |
| < \$50,000                           | 5                     | 2.92%  | 12       | 11.76% |                 |          |
| \$50,000 - \$150,000                 | 78                    | 45.61% | 54       | 52.94% |                 |          |
| >= \$150,000                         | 88                    | 51.46% | 36       | 35.29% |                 |          |

**Table 7 - Respondent Demographics by Autism Diagnosis**

|                       | Autism Diagnosis |        |          |        | $\chi$          | <i>p</i> |
|-----------------------|------------------|--------|----------|--------|-----------------|----------|
|                       | Negative         |        | Positive |        |                 |          |
|                       | n                | %      | n        | %      |                 |          |
| Relationship to Child |                  |        |          |        | 0.89            | .641     |
| Mother                | 316              | 91.59% | 58       | 92.06% |                 |          |
| Father                | 27               | 7.83%  | 4        | 6.35%  |                 |          |
| Other Primary         | 2                | 0.58%  | 1        | 1.59%  |                 |          |
| Age - [Mean (SD)]     | 34.32            | (4.26) | 33.98    | (4.77) | <i>t</i> = 0.55 | .585     |
| Age - [Min Max]       | 19               | 46     | 24       | 43     |                 |          |
| Marital Status        |                  |        |          |        | 13.81           | .017     |
| Married               | 319              | 93.27% | 49       | 80.33% |                 |          |
| Separated             | 2                | 0.58%  | 2        | 3.28%  |                 |          |
| Widowed               | 1                | 0.29%  | 0        | 0.00%  |                 |          |
| Never married         | 7                | 2.05%  | 5        | 8.20%  |                 |          |
| Living with partner   | 11               | 3.22%  | 4        | 6.56%  |                 |          |
| Race                  |                  |        |          |        | 11.65           | .020     |
| Asian                 | 22               | 6.38%  | 7        | 11.11% |                 |          |
| Black                 | 25               | 7.25%  | 12       | 19.05% |                 |          |
| White                 | 274              | 79.42% | 40       | 63.49% |                 |          |
| Multiple              | 18               | 5.22%  | 3        | 4.76%  |                 |          |
| Unknown               | 6                | 1.74%  | 1        | 1.59%  |                 |          |
| Hispanic or Latino    |                  |        |          |        | 0.26            | .876     |
| No                    | 321              | 93.86% | 58       | 95.08% |                 |          |
| Yes                   | 20               | 5.85%  | 3        | 4.92%  |                 |          |
| Bachelor Degree       |                  |        |          |        | 4.07            | .044     |
| No                    | 58               | 16.96% | 17       | 27.87% |                 |          |
| Yes                   | 284              | 83.04% | 44       | 72.13% |                 |          |
| Household Income      |                  |        |          |        | 19.88           | < .001   |
| < \$50,000            | 9                | 3.85%  | 9        | 22.50% |                 |          |
| \$50,000 - \$150,000  | 114              | 48.72% | 18       | 45.00% |                 |          |
| >= \$150,000          | 111              | 47.44% | 13       | 32.50% |                 |          |

**Table 8 - Respondent Demographics by MCHAT-R Result**

|                       | MCHAT-R Result |        |          |        | $\chi$          | <i>p</i> |
|-----------------------|----------------|--------|----------|--------|-----------------|----------|
|                       | Negative       |        | Positive |        |                 |          |
|                       | n              | %      | n        | %      |                 |          |
| Relationship to Child |                |        |          |        | 0.40            | .820     |
| Mother                | 225            | 92.21% | 149      | 90.85% |                 |          |
| Father                | 17             | 6.97%  | 14       | 8.54%  |                 |          |
| Other Primary         | 2              | 0.82%  | 1        | 0.61%  |                 |          |
| Age - [Mean (SD)]     | 34.31          | (4.05) | 34.20    | (4.76) | <i>t</i> = 0.24 | .810     |
| Age - [Min Max]       | 24             | 43     | 19       | 46     |                 |          |
| Marital Status        |                |        |          |        | 8.64            | .124     |
| Married               | 226            | 93.39% | 142      | 88.20% |                 |          |
| Separated             | 0              | 0.00%  | 4        | 2.48%  |                 |          |
| Widowed               | 1              | 0.41%  | 0        | 0.00%  |                 |          |
| Never married         | 6              | 2.48%  | 6        | 3.73%  |                 |          |
| Living with partner   | 7              | 2.89%  | 8        | 4.97%  |                 |          |
| Race                  |                |        |          |        | 16.60           | .002     |
| Asian                 | 15             | 6.15%  | 14       | 8.54%  |                 |          |
| Black                 | 14             | 5.74%  | 23       | 14.02% |                 |          |
| White                 | 201            | 82.38% | 113      | 68.90% |                 |          |
| Multiple              | 13             | 5.33%  | 8        | 4.88%  |                 |          |
| Unknown               | 1              | 0.41%  | 6        | 3.66%  |                 |          |
| Hispanic or Latino    |                |        |          |        | 1.76            | .414     |
| No                    | 227            | 93.80% | 152      | 94.41% |                 |          |
| Yes                   | 15             | 6.20%  | 8        | 4.97%  |                 |          |
| Bachelor Degree       |                |        |          |        | 13.46           | < .001   |
| No                    | 31             | 12.81% | 44       | 27.33% |                 |          |
| Yes                   | 211            | 87.19% | 117      | 72.67% |                 |          |
| Household Income      |                |        |          |        | 13.48           | .001     |
| < \$50,000            | 5              | 2.91%  | 13       | 12.75% |                 |          |
| \$50,000 - \$150,000  | 79             | 45.93% | 53       | 51.96% |                 |          |
| >= \$150,000          | 88             | 51.16% | 36       | 35.29% |                 |          |



**Table 9 - Respondent Demographics by MCHAT-R/F Result**

|                       | MCHAT-R/F Result |        |          |        | $\chi$          | <i>p</i> |
|-----------------------|------------------|--------|----------|--------|-----------------|----------|
|                       | Negative         |        | Positive |        |                 |          |
|                       | n                | %      | n        | %      |                 |          |
| Relationship to Child |                  |        |          |        | 0.70            | .705     |
| Mother                | 288              | 91.43% | 48       | 90.57% |                 |          |
| Father                | 24               | 7.62%  | 5        | 9.43%  |                 |          |
| Other Primary         | 3                | 0.95%  | 0        | 0.00%  |                 |          |
| Age - [Mean (SD)]     | 34.27            | (4.13) | 34.08    | (5.36) | <i>t</i> = 0.28 | .777     |
| Age - [Min Max]       | 24               | 45     | 19       | 46     |                 |          |
| Marital Status        |                  |        |          |        | 19.76           | .001     |
| Married               | 292              | 93.29% | 44       | 84.62% |                 |          |
| Separated             | 0                | 0.00%  | 3        | 5.77%  |                 |          |
| Widowed               | 1                | 0.32%  | 0        | 0.00%  |                 |          |
| Never married         | 9                | 2.88%  | 2        | 3.85%  |                 |          |
| Living with partner   | 9                | 2.88%  | 2        | 3.85%  |                 |          |
| Race                  |                  |        |          |        | 23.78           | < .001   |
| Asian                 | 22               | 6.98%  | 3        | 5.66%  |                 |          |
| Black                 | 23               | 7.30%  | 9        | 16.98% |                 |          |
| White                 | 254              | 80.63% | 35       | 66.04% |                 |          |
| Multiple              | 15               | 4.76%  | 2        | 3.77%  |                 |          |
| Unknown               | 1                | 0.32%  | 4        | 7.55%  |                 |          |
| Hispanic or Latino    |                  |        |          |        | 0.21            | .903     |
| No                    | 296              | 94.57% | 49       | 94.23% |                 |          |
| Yes                   | 16               | 5.11%  | 3        | 5.77%  |                 |          |
| Bachelor Degree       |                  |        |          |        | 18.37           | < .001   |
| No                    | 44               | 14.06% | 20       | 38.46% |                 |          |
| Yes                   | 269              | 85.94% | 32       | 61.54% |                 |          |
| Household Income      |                  |        |          |        | 16.76           | < .001   |
| < \$50,000            | 9                | 4.05%  | 7        | 23.33% |                 |          |
| \$50,000 - \$150,000  | 108              | 48.65% | 13       | 43.33% |                 |          |
| >= \$150,000          | 105              | 47.30% | 10       | 33.33% |                 |          |

**Table 10 - Respondent Demographics by QCHAT-10 Result**

|                       | QCHAT-10 Result |        |          |        | $\chi$          | <i>p</i> |
|-----------------------|-----------------|--------|----------|--------|-----------------|----------|
|                       | Negative        |        | Positive |        |                 |          |
|                       | n               | %      | n        | %      |                 |          |
| Relationship to Child |                 |        |          |        | 1.96            | .375     |
| Mother                | 337             | 91.83% | 35       | 89.74% |                 |          |
| Father                | 28              | 7.63%  | 3        | 7.69%  |                 |          |
| Other Primary         | 2               | 0.54%  | 1        | 2.56%  |                 |          |
| Age - [Mean (SD)]     | 34.27           | (4.20) | 34.24    | (5.61) | <i>t</i> = 0.05 | .961     |
| Age - [Min Max]       | 24              | 46     | 19       | 43     |                 |          |
| Marital Status        |                 |        |          |        | 15.70           | .008     |
| Married               | 337             | 92.84% | 29       | 76.32% |                 |          |
| Separated             | 3               | 0.83%  | 1        | 2.63%  |                 |          |
| Widowed               | 1               | 0.28%  | 0        | 0.00%  |                 |          |
| Never married         | 8               | 2.20%  | 4        | 10.53% |                 |          |
| Living with partner   | 11              | 3.03%  | 4        | 10.53% |                 |          |
| Race                  |                 |        |          |        | 6.01            | 0.198    |
| Asian                 | 28              | 7.63%  | 1        | 2.56%  |                 |          |
| Black                 | 30              | 8.17%  | 6        | 15.38% |                 |          |
| White                 | 286             | 77.93% | 27       | 69.23% |                 |          |
| Multiple              | 17              | 4.63%  | 4        | 10.26% |                 |          |
| Unknown               | 6               | 1.63%  | 1        | 2.56%  |                 |          |
| Hispanic or Latino    |                 |        |          | 100.00 | 2.67            | .263     |
| No                    | 339             | 93.39% | 38       | %      |                 |          |
| Yes                   | 23              | 6.34%  | 0        | 0.00%  |                 |          |
| Bachelor Degree       |                 |        |          |        | 6.93            | .008     |
| No                    | 61              | 16.80% | 13       | 34.21% |                 |          |
| Yes                   | 302             | 83.20% | 25       | 65.79% |                 |          |
| Household Income      |                 |        |          |        | 7.42            | .025     |
| < \$50,000            | 13              | 5.18%  | 4        | 18.18% |                 |          |
| \$50,000 - \$150,000  | 120             | 47.81% | 12       | 54.55% |                 |          |
| >= \$150,000          | 118             | 47.01% | 6        | 27.27% |                 |          |

**Table 11 - Respondent Demographics by QCHAT-10-O Result**

|                       | QCHAT-10-O Result |        |          |        | $\chi$          | <i>p</i> |
|-----------------------|-------------------|--------|----------|--------|-----------------|----------|
|                       | Negative          |        | Positive |        |                 |          |
|                       | n                 | %      | n        | %      |                 |          |
| Relationship to Child |                   |        |          |        | 1.19            | .552     |
| Mother                | 273               | 92.54% | 99       | 89.19% |                 |          |
| Father                | 20                | 6.78%  | 11       | 9.91%  |                 |          |
| Other Primary         | 2                 | 0.68%  | 1        | 0.90%  |                 |          |
| Age - [Mean (SD)]     | 34.32             | (4.06) | 34.13    | (5.06) | <i>t</i> = 0.39 | .696     |
| Age - [Min Max]       | 24                | 46     | 19       | 45     |                 |          |
| Marital Status        |                   |        |          |        | 13.23           | .021     |
| Married               | 274               | 94.16% | 92       | 83.64% |                 |          |
| Separated             | 2                 | 0.69%  | 2        | 1.82%  |                 |          |
| Widowed               | 0                 | 0.00%  | 1        | 0.91%  |                 |          |
| Never married         | 5                 | 1.72%  | 7        | 6.36%  |                 |          |
| Living with partner   | 8                 | 2.75%  | 7        | 6.36%  |                 |          |
| Race                  |                   |        |          |        | 6.35            | .174     |
| Asian                 | 17                | 5.76%  | 12       | 10.81% |                 |          |
| Black                 | 22                | 7.46%  | 14       | 12.61% |                 |          |
| White                 | 235               | 79.66% | 78       | 70.27% |                 |          |
| Multiple              | 16                | 5.42%  | 5        | 4.50%  |                 |          |
| Unknown               | 5                 | 1.69%  | 2        | 1.80%  |                 |          |
| Hispanic or Latino    |                   |        |          |        | 2.67            | .263     |
| No                    | 274               | 94.16% | 103      | 93.64% |                 |          |
| Yes                   | 17                | 5.84%  | 6        | 5.45%  |                 |          |
| Bachelor Degree       |                   |        |          |        | 3.74            | .053     |
| No                    | 47                | 16.15% | 27       | 24.55% |                 |          |
| Yes                   | 244               | 83.85% | 83       | 75.45% |                 |          |
| Household Income      |                   |        |          |        | 4.70            | .095     |
| < \$50,000            | 9                 | 4.43%  | 8        | 11.43% |                 |          |
| \$50,000 - \$150,000  | 98                | 48.28% | 34       | 48.57% |                 |          |
| >= \$150,000          | 96                | 47.29% | 28       | 40.00% |                 |          |

**Table 12 - Respondent Demographics by Positive on M-CHAT-R OR Q-CHAT-10**

|                       | M-CHAT-R OR Q-CHAT-10 |        |          |        | $\chi$          | <i>p</i> |
|-----------------------|-----------------------|--------|----------|--------|-----------------|----------|
|                       | Negative              |        | Positive |        |                 |          |
|                       | n                     | %      | n        | %      |                 |          |
| Relationship to Child |                       |        |          |        | 0.34            | .842     |
| Mother                | 222                   | 92.12% | 150      | 90.91% |                 |          |
| Father                | 17                    | 7.05%  | 14       | 8.48%  |                 |          |
| Other Primary         | 2                     | 0.83%  | 1        | 0.61%  |                 |          |
| Age - [Mean (SD)]     | 34.36                 | (4.01) | 34.13    | (4.82) | <i>t</i> = 0.52 | .603     |
| Age - [Min Max]       | 24                    | 43     | 19       | 46     |                 |          |
| Marital Status        |                       |        |          |        | 8.41            | .135     |
| Married               | 223                   | 93.31% | 143      | 88.27% |                 |          |
| Separated             | 0                     | 0.00%  | 4        | 2.47%  |                 |          |
| Widowed               | 1                     | 0.42%  | 0        | 0.00%  |                 |          |
| Never married         | 6                     | 2.51%  | 6        | 3.70%  |                 |          |
| Living with partner   | 7                     | 2.93%  | 8        | 4.94%  |                 |          |
| Race                  |                       |        |          |        | 15.20           | .004     |
| Asian                 | 15                    | 6.22%  | 14       | 8.48%  |                 |          |
| Black                 | 14                    | 5.81%  | 22       | 13.33% |                 |          |
| White                 | 199                   | 82.57% | 114      | 69.09% |                 |          |
| Multiple              | 12                    | 4.98%  | 9        | 5.45%  |                 |          |
| Unknown               | 1                     | 0.41%  | 6        | 3.64%  |                 |          |
| Hispanic or Latino    |                       |        |          |        | 1.78            | .410     |
| No                    | 224                   | 93.72% | 153      | 94.44% |                 |          |
| Yes                   | 15                    | 6.28%  | 8        | 4.94%  |                 |          |
| Bachelor Degree       |                       |        |          |        | 13.69           | < .001   |
| No                    | 30                    | 12.55% | 44       | 27.16% |                 |          |
| Yes                   | 209                   | 87.45% | 118      | 72.84% |                 |          |
| Household Income      |                       |        |          |        | 12.41           | .002     |
| < \$50,000            | 5                     | 2.92%  | 12       | 11.76% |                 |          |
| \$50,000 - \$150,000  | 78                    | 45.61% | 54       | 52.94% |                 |          |
| >= \$150,000          | 88                    | 51.46% | 36       | 35.29% |                 |          |
